# Supplementary material for: Retrospective evaluation of toceranib phosphate (Palladia®) use in the treatment of gastrointestinal stromal tumors of dogs
Source: PubMed Central journal article supplement — J Vet Intern Med. 2018 Oct 11;32(6):2045–53. doi: 10.1111/jvim.15335 (PMC6271363; doi:10.1111/jvim.15335), 2018-10-11
Supplement: JVIM-32-2045-s001.pdf [file JVIM-32-2045-s001.pdf]

**Table S1:** Cases of canine GIST and pathologic characteristics at diagnosis.

| Case | Tumor location | Longest diameter (cm) | Mitotic index: per hpf* / per 10hpf | Tumor rupture at diagnosis | IHC: cKit / DOG1 | cKit mutation (ITD**, exons 8 & 11) | Metastasis at diagnosis |
|------|----------------|-----------------------|-------------------------------------|----------------------------|------------------|-------------------------------------|-------------------------|
| 1    | Intestine      | 7                     | 0-1 / 7                             | Absent                     | - / +            | Absent                              | Present                 |
| 2    | Cecum          | 3                     | 0-1 / 4                             | Absent                     | + / +            | Exon 11                             | Absent                  |
| 3    | Intestine      | 4                     | 0-2 / 7                             | Absent                     | + / +            | Absent                              | Absent                  |
| 4    | Cecum          | 3                     | 1-2 / 14                            | Present                    | + / +            | Absent                              | Absent                  |
| 5    | Cecum          | 5                     | NE† / 8                             | Absent                     | + / NE           | NE                                  | Absent                  |
| 6    | Cecum          | 6                     | 2 / NE                              | Absent                     | + / +            | NE                                  | Present                 |
| 7    | Stomach        | 5                     | NE / 14                             | Absent                     | + / NE           | NE                                  | Absent                  |
| 8    | Cecum          | 5                     | NE / 2                              | Absent                     | + / NE           | NE                                  | Present                 |
| 9    | Intestine      | 4                     | NE / NE                             | Absent                     | + / NE           | NE                                  | Present                 |
| 10   | Stomach        | 14                    | NE / 3                              | Absent                     | + / NE           | NE                                  | Present                 |
| 11   | Cecum          | 5                     | 0-2 / 9                             | Absent                     | + / +            | QNS‡                                | Absent                  |
| 12   | Cecum          | 3                     | 0-1 / 4                             | Absent                     | + / +            | Absent                              | Present                 |
| 13   | Cecum          | 3                     | 0-1 / 4                             | Absent                     | + / +            | Absent                              | Present                 |
| 14   | Cecum          | 6                     | 0-2 / 5                             | Present                    | + / +            | Absent                              | Present                 |
| 15   | Intestine      | 8                     | 2 / NE                              | Absent                     | + / NE           | NE                                  | Absent                  |
| 16   | Cecum          | 3                     | NE / 1                              | Absent                     | + / NE           | NE                                  | Absent                  |
| 17   | Intestine      | 3                     | 4 / 5                               | Present                    | + / NE           | NE                                  | Present                 |
| 18   | Stomach        | 2                     | 0-1 / 4                             | Absent                     | + / +            | Absent                              | Absent                  |
| 19   | Intestine      | 5                     | 0-3 / 11                            | Absent                     | + / +            | Absent                              | Present                 |
| 20   | Intestine      | 10                    | 1-3 / 13                            | Absent                     | + / +            | Absent                              | Absent                  |
| 21   | Colon          | NE                    | 2 / NE                              | Absent                     | + / NE           | NE                                  | Absent                  |
| 22   | Intestine      | 5                     | 0-2 / 8                             | Absent                     | + / +            | Absent                              | Absent                  |
| 23   | Intestine      | 8                     | 4 / 27                              | Absent                     | + / +            | Absent                              | Present                 |
| 24   | Cecum          | 6                     | 1 / NE                              | Absent                     | + / NE           | NE                                  | Absent                  |
| 25   | Intestine      | NE                    | NE / 22                             | Absent                     | + / NE           | NE                                  | Absent                  |
| 26   | Intestine      | NE                    | NE / 1                              | Absent                     | + / NE           | NE                                  | Absent                  |
| 27   | Cecum          | NE                    | NE / 4                              | Absent                     | + / NE           | NE                                  | Absent                  |

\*hpf = high power field, 400x magnification

\*\*ITD = internal tandem duplication

†NE = not examined

‡QNS= sample quantity not sufficient for re-testing
